# Supplementary material for: Ni-doped MoS2 nanoparticles as highly active hydrogen evolution electrocatalysts
Source: Royal Society of Chemistry journal article supplement (doi:10.1039/c6ra02610a), 2016-01-01
Supplement: c6ra02610a1.pdf [file c6ra02610a1.pdf]

## Supporting information

### **Ni-doped MoS<sub>2</sub> nanoparticles as highly active hydrogen evolution electrocatalysts**

Dezhi Wang<sup>a, b</sup>, Xiangyong Zhang<sup>a</sup>, Yilin Shen<sup>a</sup>, Zhuangzhi Wu<sup>a, b\*</sup>

<sup>a</sup>School of Materials Science and Engineering, Central South University, Changsha 410083, China

<sup>b</sup>Key Laboratory of Ministry of Education for Non-ferrous Materials Science and Engineering, Central South University, Changsha 410083, China

*\*E-mail: zwu2012@csu.edu.cn*

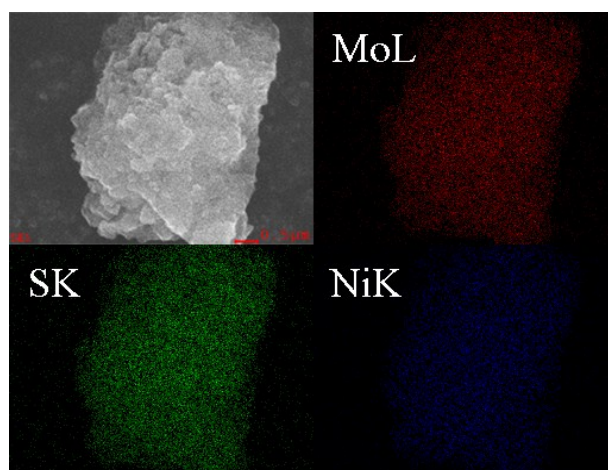

**Fig. S1** SEM-EDS elemental mapping of the Ni-MoS<sub>2</sub> catalyst.

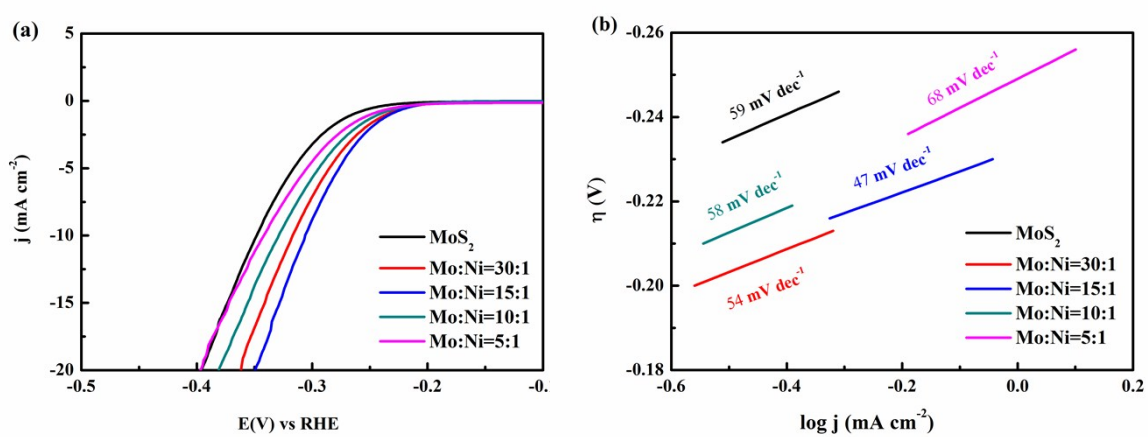

**Fig. S2** (a) Polarization curves and (b) derived Tafel plots over various catalysts with different nickel contents.
